# Supplementary material for: Immunogenicity and safety of the HPV-16/18 AS04-adjuvanted vaccine in healthy Chinese girls and women aged 9 to 45 years: Results from 2 randomized controlled trials
Source: PubMed Central journal article supplement — Hum Vaccin Immunother. 2014 Apr 29;10(7):1795–806. doi: 10.4161/hv.28702 (PMC4186032; doi:10.4161/hv.28702), 2014-04-29
Supplement: hvi-10-1795-s01.pdf [file hvi-10-1795-s01.pdf]

## **Supplemental Material to:**

**Fengcai Zhu, Juan Li, Yuemei Hu, Xiang Zhang, Xiaoping Yang, Hui Zhao, Junzhi Wang, Jianguo Yang, Guodong Xia, Qinyong Dai, Haiwen Tang, P V Suryakiran, Sanjoy Datta, Dominique Descamps, Dan Bi, and Frank Struyf**

**Immunogenicity and safety of the HPV-16/18 AS04-adjuvanted vaccine in healthy Chinese girls and women aged 9 to 45 years: Results from two randomized controlled trials**

**Human Vaccines & Immunotherapeutics 2014; 10(7)  
<http://dx.doi.org/10.4161/hv.28702>**

**[www.landesbioscience.com/journals/vaccines/article/28702](http://www.landesbioscience.com/journals/vaccines/article/28702)**

## SUPPLEMENTARY MATERIAL

**Supplementary Table 1 Seropositivity rates and GMTs for anti-HPV-16 antibodies by age strata: vaccine group**

| Antibody    | Age (years)  | Pre-vaccination status | Time    | N   | Seropositive |        | GMT (EU/mL) |         |         |
|-------------|--------------|------------------------|---------|-----|--------------|--------|-------------|---------|---------|
|             |              |                        |         |     | n            | %      | Value       | LL      | UL      |
| Anti-HPV-16 | 9–11         | Seronegative           | Pre     | 99  | 0            | 0.0    | 4.0         | 4.0     | 4.0     |
|             |              |                        | Month 7 | 99  | 99           | 100    | 25093.4     | 21714.6 | 28998.0 |
|             |              | Seropositive           | Pre     | 9   | 9            | 100    | 21.5        | 13.4    | 34.6    |
|             |              |                        | Month 7 | 9   | 9            | 100    | 25092.3     | 14001.2 | 44969.4 |
|             |              | Total                  | Pre     | 108 | 9            | 8.3    | 4.6         | 4.2     | 5.1     |
|             |              |                        | Month 7 | 108 | 108          | 100    | 25093.4     | 21855.2 | 28811.3 |
|             | 12–14        | Seronegative           | Pre     | 113 | 0            | 0.0    | 4.0         | 4.0     | 4.0     |
|             |              |                        | Month 7 | 113 | 113          | 100    | 20017.2     | 17470.4 | 22935.3 |
|             |              | Seropositive           | Pre     | 10  | 10           | 100    | 18.6        | 12.8    | 27.2    |
|             |              |                        | Month 7 | 10  | 10           | 100    | 17548.6     | 10306.6 | 29879.0 |
|             |              | Total                  | Pre     | 123 | 10           | 8.1    | 4.5         | 4.2     | 4.9     |
|             |              |                        | Month 7 | 123 | 123          | 100    | 19804.2     | 17387.7 | 22556.4 |
|             | 15–17        | Seronegative           | Pre     | 114 | 0            | 0.0    | 4.0         | 4.0     | 4.0     |
|             |              |                        | Month 7 | 114 | 114          | 100    | 13503.7     | 11735.3 | 15538.7 |
|             |              | Seropositive           | Pre     | 17  | 17           | 100    | 19.8        | 15.1    | 25.9    |
|             |              |                        | Month 7 | 17  | 17           | 100    | 11275.1     | 7300.7  | 17413.1 |
|             |              | Total                  | Pre     | 131 | 17           | 13.0   | 4.9         | 4.5     | 5.4     |
|             |              |                        | Month 7 | 131 | 131          | 100    | 13191.3     | 11552.4 | 15062.8 |
|             | 18–25        | Seronegative           | Pre     | 244 | 0            | 0.0    | 4.0         | 4.0     | 4.0     |
|             |              |                        | Month 7 | 244 | 244          | 100    | 6996.2      | 6211.7  | 7879.7  |
|             |              | Seropositive           | Pre     | 107 | 107          | 100    | 27.6        | 22.8    | 33.4    |
|             |              |                        | Month 7 | 107 | 107          | 100    | 5698.0      | 4702.6  | 6904.1  |
|             |              | Total                  | Pre     | 351 | 107          | 30.5   | 7.2         | 6.5     | 8.0     |
|             |              |                        | Month 7 | 351 | 351          | 100    | 6571.8      | 5939.0  | 7272.2  |
| 26–35       | Seronegative | Pre                    | 190     | 0   | 0.0          | 4.0    | 4.0         | 4.0     |         |
|             |              | Month 7                | 190     | 190 | 100          | 7599.8 | 6759.1      | 8545.1  |         |
|             | Seropositive | Pre                    | 111     | 111 | 100          | 33.0   | 27.5        | 39.5    |         |
|             |              | Month 7                | 111     | 111 | 100          | 6674.9 | 5841.2      | 7627.5  |         |
|             | Total        | Pre                    | 301     | 111 | 36.9         | 8.7    | 7.6         | 9.9     |         |
|             |              | Month 7                | 301     | 301 | 100          | 7244.7 | 6629.9      | 7916.5  |         |
| 36–45       | Seronegative | Pre                    | 155     | 0   | 0.0          | 4.0    | 4.0         | 4.0     |         |
|             |              | Month 7                | 155     | 155 | 100          | 6329.8 | 5587.4      | 7170.9  |         |
|             | Seropositive | Pre                    | 140     | 140 | 100          | 32.2   | 28.1        | 36.9    |         |
|             |              | Month 7                | 140     | 140 | 100          | 5095.5 | 4462.4      | 5818.3  |         |
|             | Total        | Pre                    | 295     | 140 | 47.5         | 10.8   | 9.4         | 12.3    |         |
|             |              | Month 7                | 295     | 295 | 100          | 5710.6 | 5212.8      | 6256.0  |         |

Data are shown for the ATP cohort for immunogenicity for subjects in the HPV vaccine group.

GMT, geometric mean antibody titre; LL, lower limit of 95% confidence interval; N, number of

subjects with results available; n/%, number/percentage of subjects in the specified category; UL, upper limit of 95% confidence interval. Data for females aged 9–11, 12–14 and 15–17 years are from Study HPV-058. Data for females aged 18–25 years are from Study HPV-039. Data for females aged 26–35 and 36–45 years are from Study HPV-069. HPV-16 seropositivity defined as an ELISA concentration  $\geq 8$  EU/mL.

**Supplementary Table 2 Seropositivity rates and GMTs for anti-HPV-18 antibodies by age strata: vaccine group**

| Antibody    | Age (years)  | Pre-vaccination status | Time    | N   | Seropositive |        | GMT (EU/mL) |         |         |
|-------------|--------------|------------------------|---------|-----|--------------|--------|-------------|---------|---------|
|             |              |                        |         |     | n            | %      | Value       | LL      | UL      |
| Anti-HPV-18 | 9–11         | Seronegative           | Pre     | 103 | 0            | 0.0    | 3.5         | 3.5     | 3.5     |
|             |              |                        | Month 7 | 103 | 101          | 98.1   | 8716.1      | 6672.3  | 11385.9 |
|             |              | Seropositive           | Pre     | 5   | 5            | 100    | 29.2        | 9.5     | 89.7    |
|             |              |                        | Month 7 | 5   | 5            | 100    | 24164.6     | 18808.3 | 31046.4 |
|             |              | Total                  | Pre     | 108 | 5            | 4.6    | 3.9         | 3.5     | 4.2     |
|             |              |                        | Month 7 | 108 | 106          | 98.1   | 9137.4      | 7059.3  | 11827.3 |
|             | 12–14        | Seronegative           | Pre     | 115 | 0            | 0.0    | 3.5         | 3.5     | 3.5     |
|             |              |                        | Month 7 | 115 | 115          | 100    | 8995.6      | 7741.8  | 10452.4 |
|             |              | Seropositive           | Pre     | 8   | 8            | 100    | 25.4        | 17.7    | 36.3    |
|             |              |                        | Month 7 | 8   | 8            | 100    | 10125.5     | 4911.6  | 20874.3 |
|             |              | Total                  | Pre     | 123 | 8            | 6.5    | 4.0         | 3.6     | 4.4     |
|             |              |                        | Month 7 | 123 | 123          | 100    | 9065.1      | 7840.8  | 10480.5 |
|             | 15–17        | Seronegative           | Pre     | 120 | 0            | 0.0    | 3.5         | 3.5     | 3.5     |
|             |              |                        | Month 7 | 120 | 120          | 100    | 6371.0      | 5569.6  | 7287.7  |
|             |              | Seropositive           | Pre     | 11  | 11           | 100    | 17.3        | 11.8    | 25.3    |
|             |              |                        | Month 7 | 11  | 11           | 100    | 5453.5      | 3486.4  | 8530.7  |
|             |              | Total                  | Pre     | 131 | 11           | 8.4    | 4.0         | 3.7     | 4.3     |
|             |              |                        | Month 7 | 131 | 131          | 100    | 6288.3      | 5536.8  | 7142.0  |
|             | 18–25        | Seronegative           | Pre     | 289 | 0            | 0.0    | 3.5         | 3.5     | 3.5     |
|             |              |                        | Month 7 | 289 | 288          | 99.7   | 3309.4      | 2941.9  | 3722.8  |
|             |              | Seropositive           | Pre     | 62  | 62           | 100    | 20.7        | 16.9    | 25.4    |
|             |              |                        | Month 7 | 62  | 62           | 100    | 3242.2      | 2735.8  | 3842.4  |
|             |              | Total                  | Pre     | 351 | 62           | 17.7   | 4.8         | 4.4     | 5.2     |
|             |              |                        | Month 7 | 351 | 350          | 99.7   | 3297.4      | 2980.2  | 3648.5  |
| 26–35       | Seronegative | Pre                    | 193     | 0   | 0.0          | 3.5    | 3.5         | 3.5     |         |
|             |              | Month 7                | 193     | 193 | 100          | 3824.8 | 3386.5      | 4319.8  |         |
|             | Seropositive | Pre                    | 108     | 108 | 100          | 17.1   | 14.9        | 19.7    |         |
|             |              | Month 7                | 108     | 108 | 100          | 3722.6 | 3172.1      | 4368.7  |         |
|             | Total        | Pre                    | 301     | 108 | 35.9         | 6.2    | 5.6         | 6.8     |         |
|             |              | Month 7                | 301     | 301 | 100          | 3787.8 | 3439.9      | 4170.9  |         |
| 36–45       | Seronegative | Pre                    | 172     | 0   | 0.0          | 3.5    | 3.5         | 3.5     |         |
|             |              | Month 7                | 172     | 170 | 98.8         | 3476.0 | 2936.0      | 4115.3  |         |
|             | Seropositive | Pre                    | 123     | 123 | 100          | 16.1   | 14.3        | 18.1    |         |
|             |              | Month 7                | 123     | 123 | 100          | 3176.9 | 2787.9      | 3620.1  |         |
|             | Total        | Pre                    | 295     | 123 | 41.7         | 6.6    | 6.0         | 7.3     |         |
|             |              | Month 7                | 295     | 293 | 99.3         | 3348.0 | 2993.1      | 3744.9  |         |

Data are shown for the ATP cohort for immunogenicity for subjects in the HPV vaccine group.

GMT, geometric mean antibody titre; LL, lower limit of 95% confidence interval; N, number of subjects with results available; n/%, number/percentage of subjects in the specified category; UL, upper limit of 95% confidence interval. Data for females aged 9–11, 12–14 and 15–17 years are

from Study HPV-058. Data for females aged 18–25 years are from Study HPV-039. Data for females aged 26–35 and 36–45 years are from Study HPV-069. HPV-18 seropositivity defined as an ELISA concentration  $\geq 7$  EU/mL.
